# Supplementary material for: Steps to developing a DXA-based risk score for cardiovascular outcomes among older adults: the health, aging, and body composition study
Source: PubMed Central journal article supplement — Sci Rep. 2024 Oct 7;14:23311. doi: 10.1038/s41598-024-74185-y (PMC11458873; doi:10.1038/s41598-024-74185-y), 2024-10-07
Supplement: 41598_2024_74185_MOESM1_ESM.pdf [file 41598_2024_74185_MOESM1_ESM.pdf]

**Steps to Developing a DXA-Based Risk Score for Cardiovascular Outcomes Among Older  
Adults: The Health, Aging, and Body Composition Study**

Lihui Chen<sup>1,7</sup>, Xinran Wang<sup>1,7</sup>, Tian-Ze Lin<sup>1</sup>, Hao Xiang<sup>2</sup>, Hua Liu<sup>3</sup>, Shen Xu<sup>4</sup>, Jirong Yue<sup>5</sup>,  
Chenkai Wu<sup>1,6\*</sup>

<sup>1</sup>Global Health Research Center, Duke Kunshan University, Kunshan, Jiangsu, China,

<sup>2</sup>School of Health Sciences, Wuhan University, Wuhan, Hubei, China,

<sup>3</sup>Department of Neurosurgery, The Affiliated Kunshan Hospital of Jiangsu University, Suzhou,  
Jiangsu, China,

<sup>4</sup>Department of Endocrinology and Metabolism, West China Hospital, Sichuan University,  
Chengdu, Sichuan, China,

<sup>5</sup>Department of Geriatrics and National Clinical Research Center for Geriatrics, West China  
Hospital, Sichuan University, Chengdu, Sichuan, China,

<sup>6</sup>Duke Global Health Institute, Duke University, Durham, NC, USA.

<sup>7</sup>These authors contributed equally: Lihui Chen and Xinran Wang.

**Corresponding Author:**

Chenkai Wu, PhD, MPH, MS

Global Health Research Center, Duke Kunshan University

Academic Building 3038, 8 Duke Avenue

Kunshan, Jiangsu, China, 215316

Phone: (+86) 512 36657235

E-mail: [chenkai.wu@dukekunshan.edu.cn](mailto:chenkai.wu@dukekunshan.edu.cn)

| <b>Variables</b> | <b>Label</b>                   |
|------------------|--------------------------------|
| ablev            | Vertebral Level                |
| abslc            | Abdomen Slice Thick            |
| abpath           | Abdomen Pathology              |
| thslc            | Thigh Slice Thick              |
| thpath           | Thigh Pathology                |
| Leg              | Leg, R/L, of CT scan           |
| cttdate          | Exam Date:CT soft tissue       |
| hip              | Staff ID: DXA                  |
| hipmode          | Hip Scan Mode                  |
| hipscanid        | Hip scan ID                    |
| hipdate          | Hip Date of Exam               |
| wbscnpro         | Scan Protocol                  |
| wbfinal          | Whole Body Final scan status   |
| wbmode           | Whole Body Scan Mode           |
| wbscanid         | Whole Body Scan ID on printout |
| wbdate           | Whole Body Date of Exam        |

**Supplementary Table S1.** Summary of the Removed 16 Irrelevant DXA Variables.

| <b>Description</b>                                 | <b>Side of Measurement</b> |
|----------------------------------------------------|----------------------------|
| Abdomen field of view (cm)                         | -                          |
| Abdomen CT peak kilovolts (kVp)                    | -                          |
| Abdomen exposure time (ma/sec)                     | -                          |
| Maximum sagittal diameter (mm)                     | Overall                    |
| Abdomen subcutaneous fat area 1 (cm <sup>2</sup> ) | Overall                    |
| Abdomen subcutaneous fat density (HU)              | Overall                    |
| Abdomen Subcutaneous Fat Density SD (HU)           | Overall                    |
| Abdomen total area (cm <sup>2</sup> )              | Overall                    |
| Abdomen visceral fat area1 (cm <sup>2</sup> )      | Overall                    |
| Abdomen visceral fat density (HU)                  | Overall                    |
| Abdomen visceral fat density SD (HU)               | Overall                    |
| Head lean (gm)                                     | Overall                    |
| Arm lean (gm)                                      | Non-Dominant               |
| Leg lean (gm)                                      | Non-Dominant               |
| Total lean (gm)                                    | Overall                    |
| Trunk lean (gm)                                    | Overall                    |
| Head area (cm <sup>2</sup> )                       | Overall                    |
| Head bone mineral content (gm)                     | Overall                    |
| Head bone mineral density (gm/cm <sup>2</sup> )    | Overall                    |

|                                                                  |              |
|------------------------------------------------------------------|--------------|
| Head fat (gm)                                                    | Overall      |
| Head fat free mass (gm)                                          | Overall      |
| Hip total area (cm <sup>2</sup> )                                | Overall      |
| Hip total bone mineral content (gm)                              | Overall      |
| Hip total bone mineral density (gm/cm <sup>2</sup> )             | Overall      |
| Arm area (cm <sup>2</sup> )                                      | Non-Dominant |
| Arm bone mineral content (gm)                                    | Non-Dominant |
| Arm bone mineral density (gm/cm <sup>2</sup> )                   | Non-dominant |
| Arm fat (gm)                                                     | Non-dominant |
| Arm fat free mass (gm)                                           | Non-dominant |
| Y1: Total (R+L) lateral abdominal muscle area (cm <sup>2</sup> ) | Overall      |
| Lat abdominal density (HU)                                       | Non-dominant |
| Lat abdominal density SD (HU)                                    | Non-dominant |
| Leg area (cm <sup>2</sup> )                                      | Non-dominant |
| Leg bone mineral content (gm)                                    | Non-dominant |
| Leg bone mineral density (gm/cm <sup>2</sup> )                   | Non-dominant |
| Leg fat (gm)                                                     | Non-dominant |
| Leg fat free mass (gm)                                           | Non-dominant |
| Psoas area (cm <sup>2</sup> )                                    | Non-dominant |
| Psoas density (HU)                                               | Non-dominant |

|                                                         |              |
|---------------------------------------------------------|--------------|
| Psoas density SD (HU)                                   | Non-dominant |
| Rectus area (cm <sup>2</sup> )                          | Non-dominant |
| Rectus density (HU)                                     | Non-dominant |
| Rectus density SD (HU)                                  | Non-dominant |
| Rib area (cm <sup>2</sup> )                             | Non-dominant |
| Rib bone mineral content (gm)                           | Non-dominant |
| Rib bone mineral density (gm/cm <sup>2</sup> )          | Non-dominant |
| Lumbar spine area (cm <sup>2</sup> )                    | Overall      |
| Lumbar spine bone mineral content (gm)                  | Overall      |
| Lumbar spine bone mineral density (gm/cm <sup>2</sup> ) | Overall      |
| Thigh bone area (cm <sup>2</sup> )                      | Non-dominant |
| Thigh hamstrings area (cm <sup>2</sup> )                | Non-dominant |
| Thigh hamstrings density (HU)                           | Non-dominant |
| Thigh hamstrings density SD (HU)                        | Non-dominant |
| Thigh intermuscular fat area (cm <sup>2</sup> )         | Non-dominant |
| Thigh intermuscular fat density (HU)                    | Non-dominant |
| Thigh intermuscular fat density SD (HU)                 | Non-dominant |
| Thigh total muscle area (cm <sup>2</sup> )              | Non-dominant |
| Thigh total muscle density (HU)                         | Non-dominant |
| Thigh total muscle density SD (HU)                      | Non-dominant |

|                                                   |              |
|---------------------------------------------------|--------------|
| Thigh quadriceps area (cm <sup>2</sup> )          | Non-dominant |
| Thigh quadriceps density (cm <sup>2</sup> )       | Non-dominant |
| Thigh quadriceps density SD (HU)                  | Non-dominant |
| Thigh subcutaneous fat area (cm <sup>2</sup> )    | Non-dominant |
| Thigh subcutaneous fat density (HU)               | Non-dominant |
| Thigh subcutaneous fat density SD (HU)            | Non-dominant |
| Thigh total area (cm <sup>2</sup> )               | Non-dominant |
| Pelvic area (cm <sup>2</sup> )                    | Overall      |
| Pelvic bone mineral content (gm)                  | Overall      |
| Pelvic bone mineral density (gm/cm <sup>2</sup> ) | Overall      |
| Thigh length (mm)                                 | Overall      |
| Thigh Field of View (mm)                          | -            |
| Thigh CT Peak Kilovolts (kVp)                     | -            |
| Thigh exposure time (milliamps/sec)               | -            |
| Thigh scan location (mm)                          | -            |
| Total fat (gm)                                    | Overall      |
| Total fat free mass (gm)                          | Overall      |
| Total mass (gm)                                   | Overall      |
| Total percentage fat (%)                          | Overall      |
| Trunk bone mineral content (gm)                   | Overall      |

|                                                       |         |
|-------------------------------------------------------|---------|
| Trunk fat free mass (gm)                              | Overall |
| Trunk fat (gm)                                        | Overall |
| Thor spine area (cm <sup>2</sup> )                    | Overall |
| Thor spine bone mineral content (gm)                  | Overall |
| Thor spine bone mineral density (gm/cm <sup>2</sup> ) | Overall |
| Whole body total area (cm <sup>2</sup> )              | Overall |
| Whole body bone mineral content (gm)                  | Overall |
| Whole body bone mineral density (gm/cm <sup>2</sup> ) | Overall |

---

**Supplementary Table S2.** Summary of 87 DXA Variables that Entered Study.
